# Supplementary material
Source: PubMed Central journal article supplement (PMC3641830)
Supplement: NIHMS461903-supplement-Figure_S2.pdf [file NIHMS461903-supplement-Figure_S2.pdf]

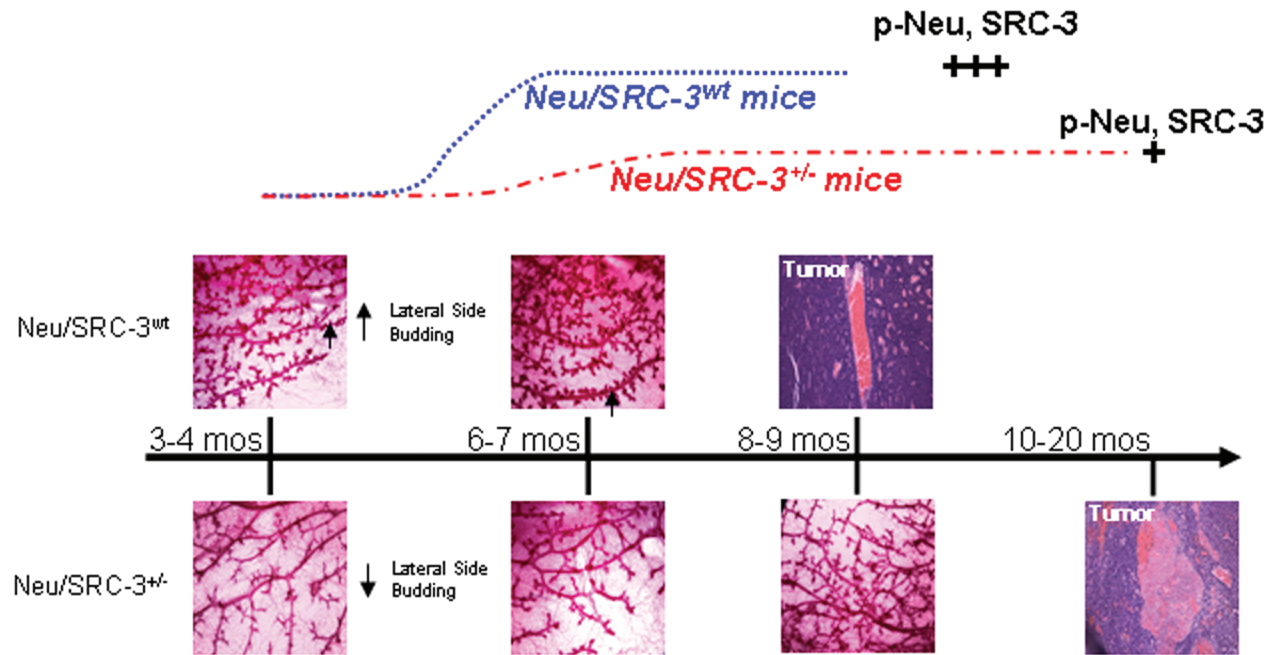

|           | 3-4 mos                 |                          | 6-7 mos                 |                          | 8-9 mos                            |                          | 10-20 mos               |                                     |
|-----------|-------------------------|--------------------------|-------------------------|--------------------------|------------------------------------|--------------------------|-------------------------|-------------------------------------|
|           | Neu/SRC-3 <sup>wt</sup> | Neu/SRC-3 <sup>+/-</sup> | Neu/SRC-3 <sup>wt</sup> | Neu/SRC-3 <sup>+/-</sup> | Neu/SRC-3 <sup>wt</sup><br>(Tumor) | Neu/SRC-3 <sup>+/-</sup> | Neu/SRC-3 <sup>wt</sup> | Neu/SRC-3 <sup>+/-</sup><br>(Tumor) |
| p-JNK     | +                       | +                        | ++                      | +                        | +++                                | +                        |                         | +                                   |
| Cyclin D1 | ++                      | +                        | ++                      | +                        | +++                                | +                        |                         | +                                   |
| Cyclin E  | +                       | +                        | ++                      | +                        | +++                                | +                        |                         | +                                   |
| p-AKT     | +                       | +                        | +                       | +                        | +++                                | +                        |                         | +                                   |
| p-MAPK    | +++                     | +                        | +++                     | +                        | +                                  | +                        |                         | +                                   |
