# Supplementary material
Source: PubMed Central journal article supplement (PMC3641830)

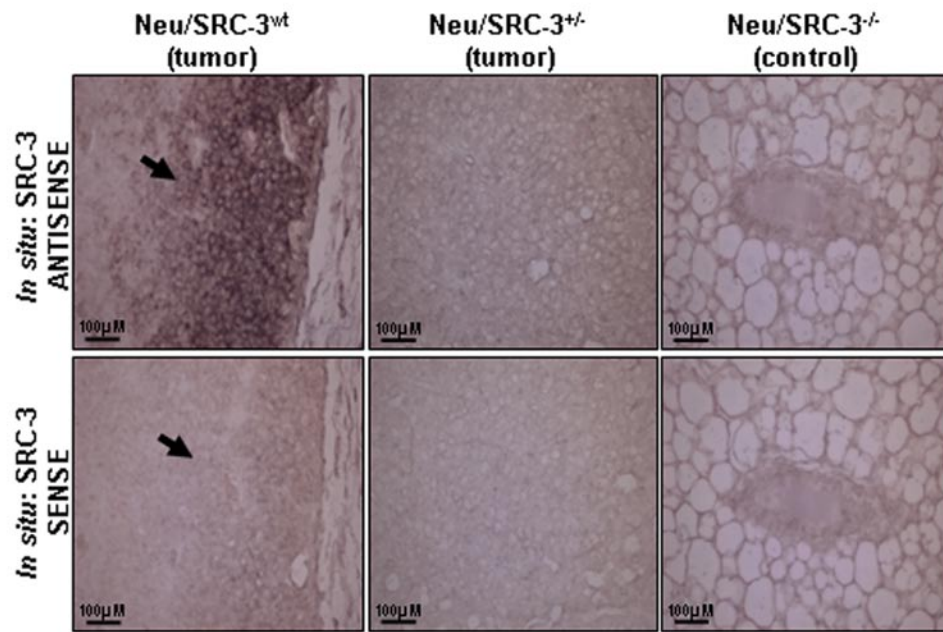

Supplement: NIHMS461903-supplement-Figure_S1.pdf [file NIHMS461903-supplement-Figure_S1.pdf]
